# Supplementary material
Source: HighWire-hosted journal article supplement (https://www.annfammed.org/content/suppl/2019/01/22/17.1.23)

**Supplemental material for:**

Graham AK, Minc A, Staab E, Beiser DG, Gibbons RD, Laiteerapong N. Validation of the computerized adaptive test for mental health in primary care. *Ann Fam Med*. 2019;17(1):23-30.

**Supplemental Figure 1.** Pie charts showing the percentage of patients indicating the screening method liked best (A) and liked least (B)

**Figure 3A: Liked Best**

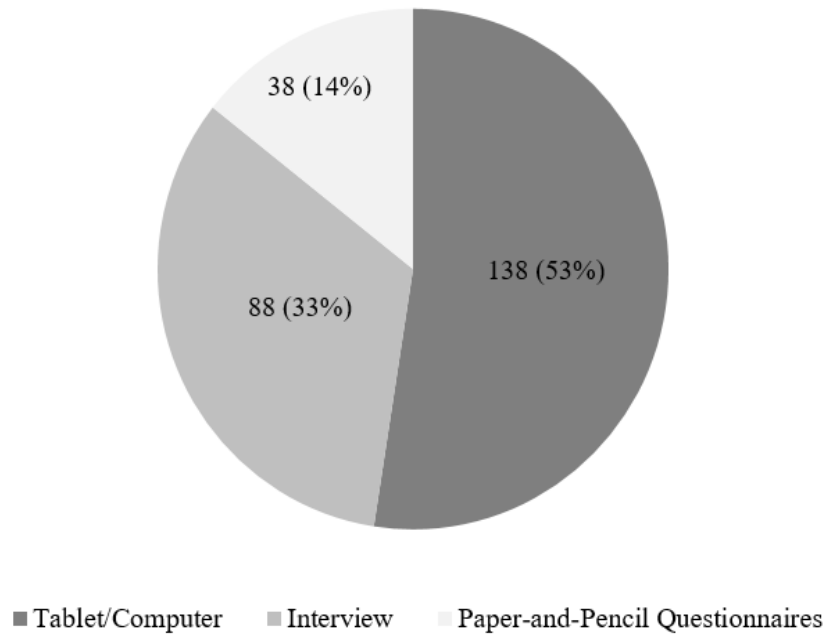

**Figure 3B: Liked Least**

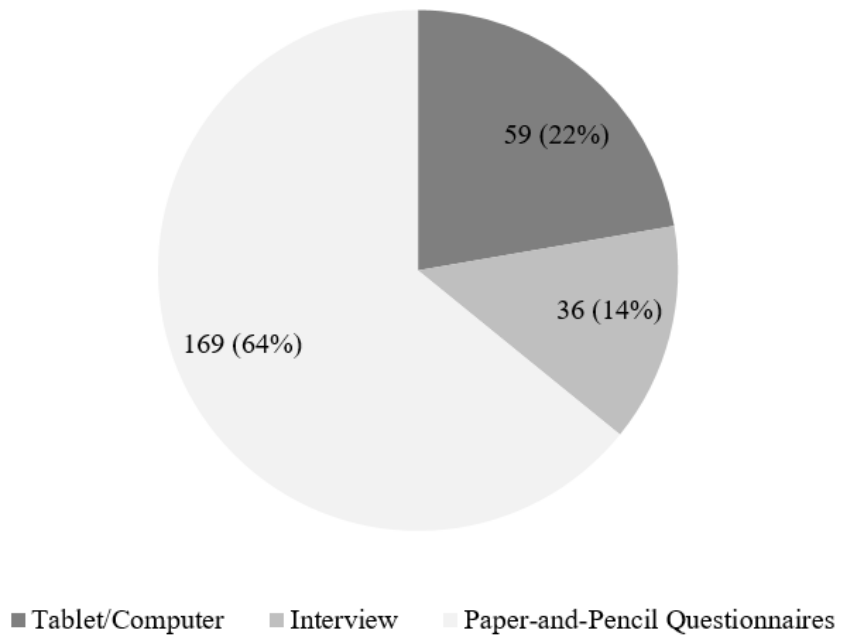

Supplement: Graham_Supp_Figs.pdf [file Graham_Supp_Figs.pdf]
